# Supplementary material
Source: publisher figshare collection journal article supplement (https://karger.figshare.com/ndownloader/files/19053047)
Supplement: Supplementary file 1 [file 19053047]

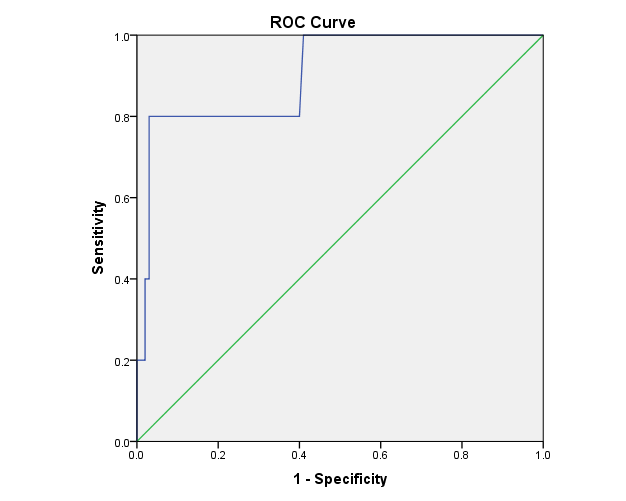


Supplementary figure: ROC Curve to differentiate the pseudo-malabsorption from true malabsorption patients by increment in Free T4 from baseline to 3 hrs (AUC 0.904, P<0.001). An increment of 0.4 ng/dl in free T4 at three hours gives a sensitivity of 80 % and specificity of 97% to exclude true malabsorption.
